# Supplementary material for: Trifunctional99mTc based radiopharmaceuticals: metal-mediated conjugation of a peptide with a nucleus targeting intercalator
Source: Royal Society of Chemistry journal article supplement (doi:10.1039/c0ob00504e), 2010-12-24

## Supporting information for

### Trifunctional $^{99m}\text{Tc}$ Based Radiopharmaceuticals: Metal-mediated Conjugation of a Peptide with a Nucleus Targeting Intercalator

Karel Zelenka<sup>a</sup>, Lubor Borsig<sup>b</sup> and Roger Alberto<sup>\*a</sup>

<sup>a</sup>*Institute of Inorganic Chemistry and* <sup>b</sup>*Institute of Physiology, University of Zürich,  
Winterthurerstr. 190, 8057 Zürich, Switzerland*

**General information:** The HPLC-MS data acquisition and processing were performed as described in experimental section. The spectral accuracy was calculated by MassWorks software (version 2.0, Cerno Bioscience, Danbury, CT, USA) using sCLIPS, which is a formula determination tool that performs peak shape calibration and matches calibrated experimental isotope pattern against possible theoretical ones using the spectral accuracy metric. The peak shape calibration is created using the monoisotope peak of the ion itself as the peak shape standard. As a standards the similar compounds with known elemental analysis were used.<sup>14</sup> The analysis were repeated under identical conditions to assure reproducibility. The red line represents the measured spectrum and the green line the fitted and calculated theoretical one. Mass errors and spectral accuracy are given in the following table.

---

\* Corresponding author, E-mail: [ariel@aci.uzh.ch](mailto:ariel@aci.uzh.ch).

**Methyl 1-(4-bromobutyl)-1H-imidazole-4-carboxylate (2)**

$^{13}\text{C}$  NMR ( $\text{CDCl}_3$ , 100 MHz)  $\delta$  163.4, 138.0, 134.3, 125.0, 51.9, 46.9, 32.4, 29.6, 29.5.

**Methyl 1-(4-bromobutyl)-1H-imidazole-5-carboxylate (3)**

$^1\text{H}$  NMR ( $\text{CDCl}_3$ , 400 MHz)  $\delta$  7.68 (s, 1H), 7.55 (s, 1H), 4.29 (t,  $^3J = 7$  Hz, 2H), 3.80 (s, 3H), 3.35 (t,  $^3J = 6.4$  Hz, 2H), 1.95-1.84 (m, 2H), 1.87-1.77 (m, 2H).  $^{13}\text{C}$  NMR ( $\text{CDCl}_3$ , 100 MHz)  $\delta$  160.8, 142.1, 138.3, 122.3, 51.7, 46.2, 32.7, 29.9, 29.7. MS (ESI)  $m/z$  (%) 261.4 (100), 263.4(98)  $[\text{M} + \text{H}]^+$ . Calcd  $\text{C}_9\text{H}_{14}\text{BrN}_2\text{O}_2^+$ : 261.0 (100.0%), 263.0 (98.2%). TLC  $R_f$  0.30 (EtOAc).  $^{13}\text{C}$  NMR ( $\text{CDCl}_3$ , 100 MHz)  $\delta$  160.8, 142.1, 138.3, 122.3, 51.7, 46.2, 32.7, 29.9, 29.7.

### 3,6-bis(dimethylamino)-10-(4-(4-(methoxycarbonyl)-1H-imidazol-1-yl)butyl)acridinium (5)

$^{13}\text{C}$  NMR ( $\text{CD}_3\text{OD}$ , 100 MHz):  $\delta$  156.5, 143.5, 143.2, 133.5, 117.6, 114.6, 92.6, 61.2, 51.1, 46.9, 40.0, 28.2, 22.9.

Calculated HR-MS and spectral accuracy of compound 5.

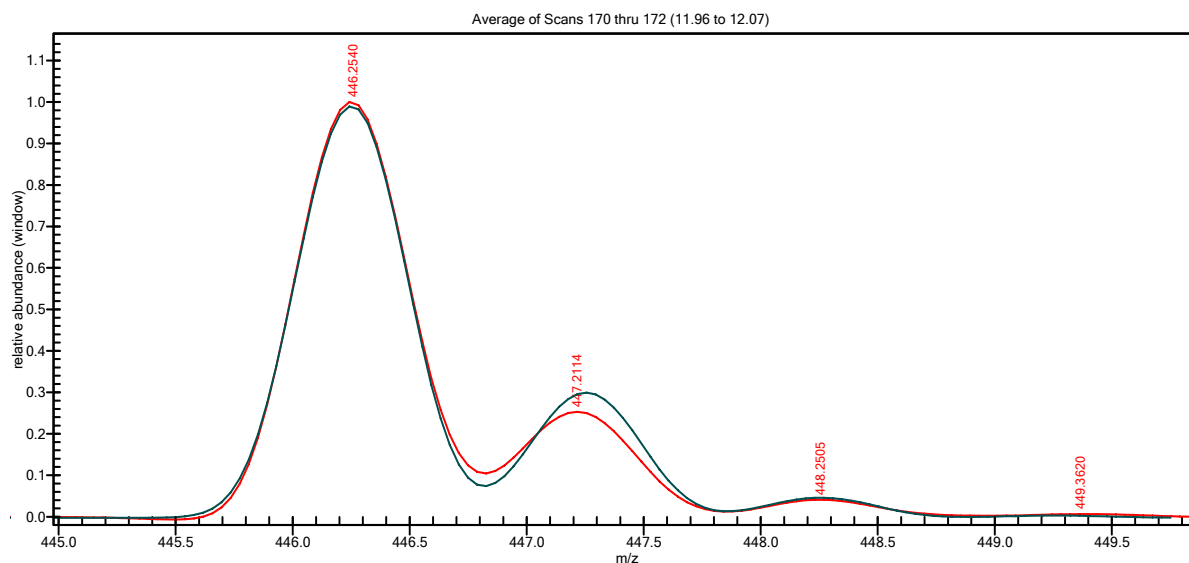

CLIPS Report - D:\Data\Karel\Cerno files\3.d\msd1.

09.07.2010 14:30:0

Calibration File D:\Data\Karel\Cerno files\Pure AO Nikos calib.m  
Calibration Time 09.07.2010 11:07:5

#### RT Windows

Average of Scans 170 thru 172 (11.96 to 12.07)

#### CLIPS Parameter:

Accurate Mass 446.2540  
Charge 1  
Mass Tolerance (mDa) 20.00  
Electron State Both

#### Double Bond Equivalent Range

Minimum: -30.00  
Maximum: 50.00

#### Profile Mass Range (Da)

Start: -5.00  
End: 3.50

| Element | Minimum | Maximum |
|---------|---------|---------|
| C       | 26      | 26      |
| N       | 5       | 5       |
| O       | 2       | 2       |
| H       | 32      | 32      |

#### CLIPS Search Result

|   | Formula                                                       | Mono Isotope | Mass Error (mDa) | Mass Error (PPM) | Spectral Accuracy | RMSE  | DBE  |
|---|---------------------------------------------------------------|--------------|------------------|------------------|-------------------|-------|------|
| 1 | C <sub>26</sub> N <sub>5</sub> O <sub>2</sub> H <sub>32</sub> | 446.2556     | 1.6003           | 3.5861           | 94.2258           | 28734 | 13.5 |

### 10-(4-(4-carboxy-1H-imidazol-1-yl)butyl)-3,6-bis(dimethylamino)acridinium (6)

$^{13}\text{C}$  NMR ( $\text{CD}_3\text{CN} + \text{D}_2\text{O}$ , 100 MHz):  $\delta$  156.4, 143.7, 143.3, 133.65, 117.5, 114.9, 92.8, 47.0, 40.6, 27.5, 23.0.

Calculated HR-MS and spectral accuracy of compound 6.

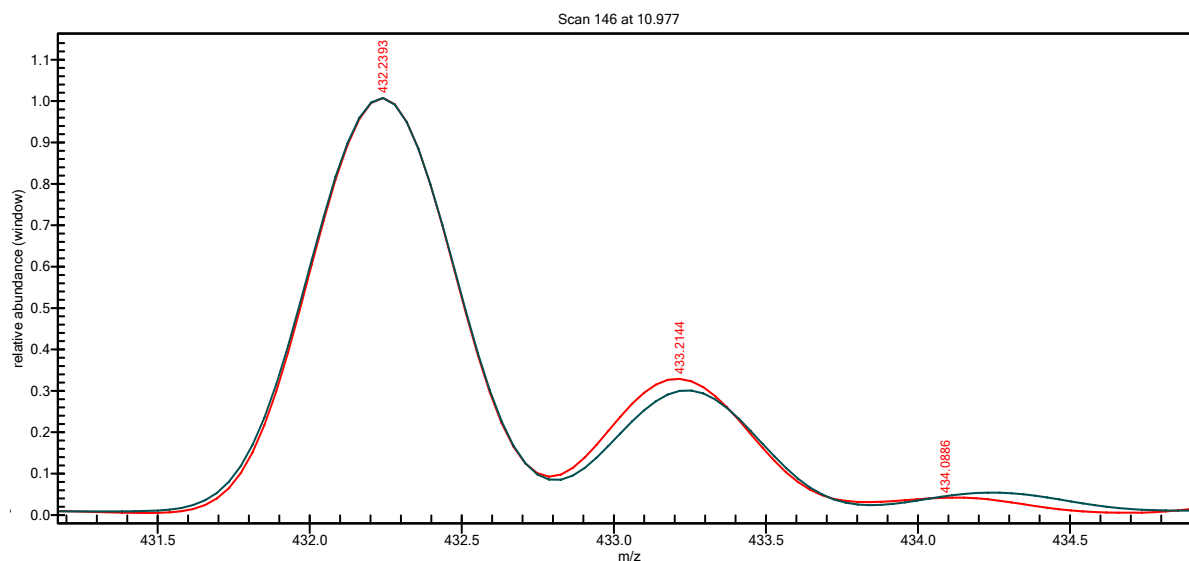

CLIPS Report - D:\Data\Karel\Cerno files\6.d\msd1.

09.07.2010 14:45:0

Calibration File D:\Data\Karel\Cerno files\Pure AO Nikos calib.m  
Calibration Time 09.07.2010 11:07:5

#### RT Windows

Scan 146 at 10.97

#### CLIPS Parameter:

Accurate Mass 432.2393  
Charge 1  
Mass Tolerance (mDa) 10.00  
Electron State Both

Double Bond Equivalent Rang  
Minimum: -30.00  
Maximum: 50.00

Profile Mass Range (Da)  
Start: -2.00  
End: 3.00

| Element | Minimum | Maximum |
|---------|---------|---------|
| C       | 25      | 36      |
| N       | 5       | 30      |
| O       | 2       | 27      |
| H       | 0       | 42      |

#### CLIPS Search Result

|   | Formula                                                       | Mono Isotope | Mass Error (mDa) | Mass Error (PPM) | Spectral Accuracy | RMSE  | DBE  |
|---|---------------------------------------------------------------|--------------|------------------|------------------|-------------------|-------|------|
| 1 | C <sub>25</sub> N <sub>5</sub> O <sub>2</sub> H <sub>30</sub> | 432.2400     | 0.6502           | 1.5043           | 95.1814           | 41862 | 13.5 |



Calculated HR-MS analysis measured from the NMR sample of **6** giving the isotopic masses.

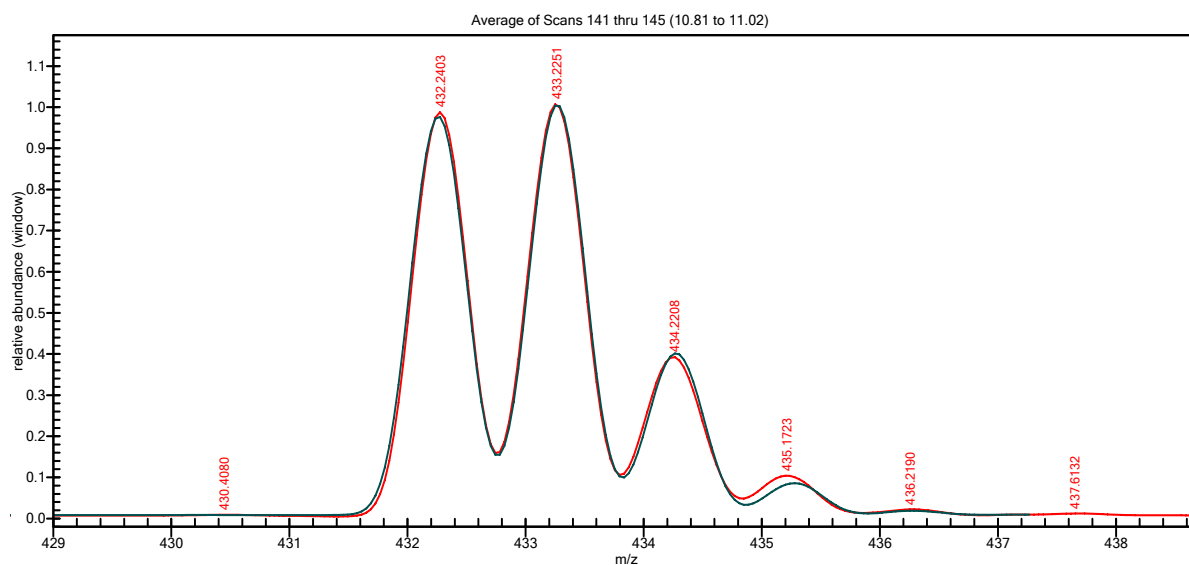

CLIPS Report - D:\Data\Karel\Cerno files\10.d\msd1.

09.07.2010 13:23:1

Calibration File D:\Data\Karel\Cerno files\Pure AO Nikos calib.m  
Calibration Time 09.07.2010 11:07:5

RT Windows

Average of Scans 141 thru 145 (10.81 to 11.02)

CLIPS Parameter

Accurate Mass 432.2403  
Charge 1  
Mass Tolerance (mDa) 100.00  
Electron State Both

Double Bond Equivalent Range  
Minimum: -30.00  
Maximum: 50.00

Profile Mass Range (Da)  
Start: -5.00  
End: 5.00

| Element | Minimum | Maximum |
|---------|---------|---------|
| C       | 25      | 25      |
| H       | 30      | 30      |
| O       | 2       | 2       |
| N       | 5       | 5       |

Mixture Search

Formula 2 C<sub>25</sub>N<sub>5</sub>O<sub>2</sub>H<sub>29</sub>[2H]  
Formula 3 C<sub>25</sub>N<sub>5</sub>O<sub>2</sub>H<sub>28</sub>[2H];

CLIPS Search Result

|   | Formula                                                       | Mono Isotope | Mass Error (mDa) | Mass Error (PPM) | Spectral Accuracy | RMSE   | DBE  |
|---|---------------------------------------------------------------|--------------|------------------|------------------|-------------------|--------|------|
| 1 | C <sub>25</sub> H <sub>30</sub> O <sub>2</sub> N <sub>5</sub> | 432.2400     | -0.3498          | -0.8092          | 95.6823           | 21.676 | 13.5 |

SI 1. The HPLC-MS trace of compound **6** (NMR sample, Gradient B).

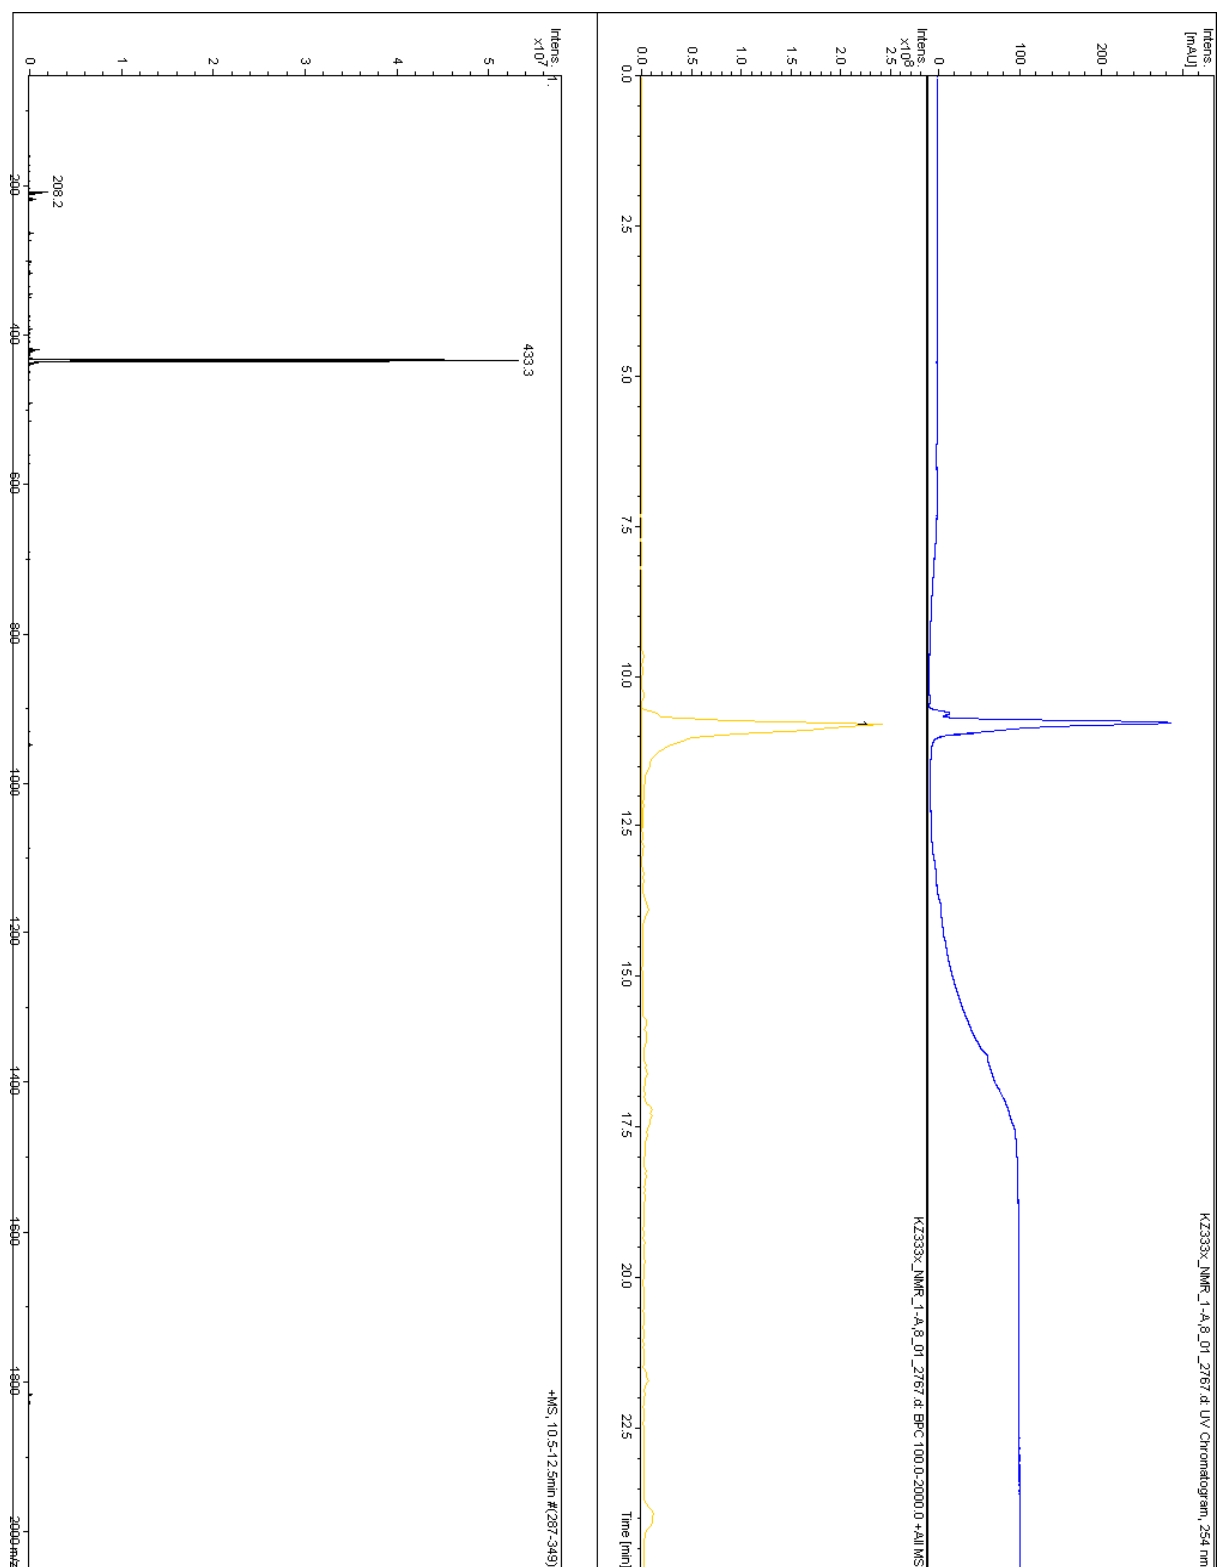

## 10-(4-bromobutyl)-3,6-bis(dimethylamino)acridinium bromide (7)

Calculated HR-MS and spectral accuracy of compound 7.

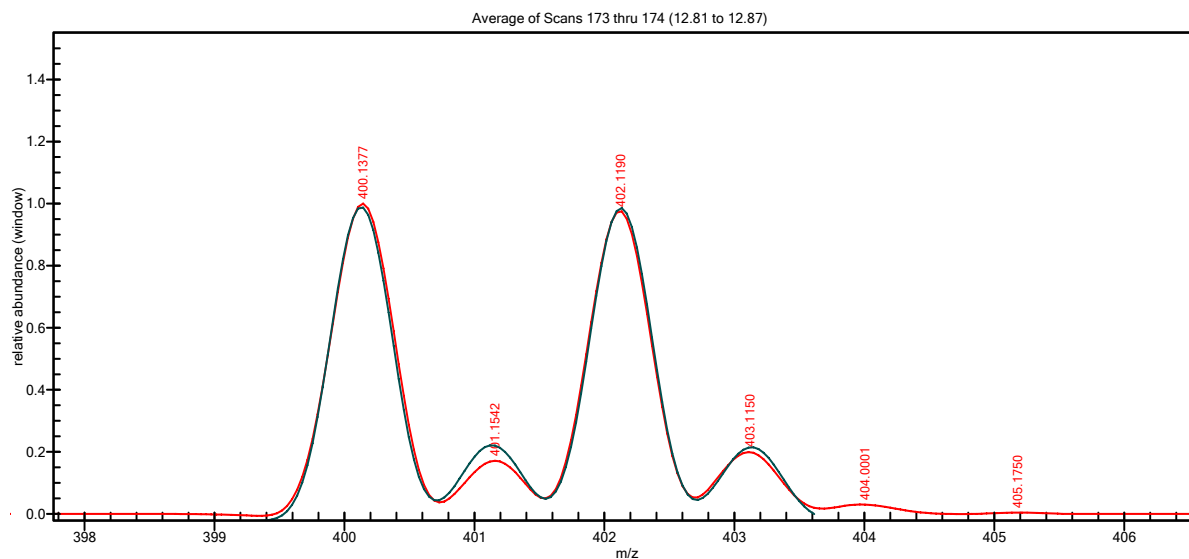

CLIPS Report - D:\Data\Karel\Cerno files8.d\msd1.

09.07.2010 13:13:0

Calibration File D:\Data\Karel\Cerno files\Pure AO Nikos calib.m  
Calibration Time 09.07.2010 11:07:5

### RT Windows

Average of Scans 173 thru 174 (12.81 to 12.87)

### CLIPS Parameter:

Accurate Mass 400.1377  
Charge 1  
Mass Tolerance (mDa) 100.00  
Electron State Both  
Double Bond Equivalent Range  
Minimum: -30.00  
Maximum: 50.00  
Profile Mass Range (Da)  
Start: -1.00  
End: 3.50

| Element | Minimum | Maximum |
|---------|---------|---------|
| C       | 21      | 21      |
| H       | 0       | 397     |
| Br      | 1       | 4       |
| N       | 3       | 3       |

### CLIPS Search Result

|   | Formula                                          | Mono Isotope | Mass Error (mDa) | Mass Error (PPM) | Spectral Accuracy | RMSE   | DBE |
|---|--------------------------------------------------|--------------|------------------|------------------|-------------------|--------|-----|
| 1 | C <sub>21</sub> H <sub>27</sub> BrN <sub>3</sub> | 400.1388     | 1.1355           | 2.8377           | 94.6332           | 43.151 | 9.5 |

**10-(4-(5-carboxy-1H-imidazol-1-yl)butyl)-3,6-bis(dimethylamino)acridinium (9)**

$^1\text{H}$  NMR ( $\text{CD}_3\text{OD}$ , 400 MHz):  $\delta$  8.92 (s, 1H), 8.57 (s, 1H), 8.06 (s, 1H), 7.82 (d,  $^3J = 9.3$  Hz, 2H), 7.19 (dd,  $^3J = 9.2$  Hz,  $^4J = 2$  Hz, 2H), 6.57 (s, 2H), 4.67 (bt,  $^3J = 8$  Hz, 2H), 4.58 (t,  $^3J = 7.3$  Hz, 2H), 3.24 (s, 12H), 2.14 (m, 2H), 1.99 (m, 2H).  $^{13}\text{C}$  NMR ( $\text{CD}_3\text{OD}$ , 100 MHz):  $\delta$  157.6, 144.6, 144.2, 141.0, 134.6, 130.3, 118.7, 115.7, 93.7, 49.3, 47.9, 41.0, 29.16, 24.0. HPLC-MS (ESI, Gradient A)  $t_{\text{R}}$ : 13.8 min;  $m/z$ : 432.2 (100)  $[\text{M}]^+$ . Calcd for  $\text{C}_{25}\text{H}_{30}\text{N}_5\text{O}_2^+$ : 432.2 (100%).  $^{13}\text{C}$  NMR ( $\text{CD}_3\text{OD}$ , 100 MHz):  $\delta$  157.6, 144.6, 144.2, 141.0, 134.6, 130.3, 118.7, 115.7, 93.7, 49.3, 47.9, 41.0, 29.16, 24.0.

**$[\text{Re}(\text{H}_2\text{O})(6)(\text{CO})_3]^+$  (10) and  $[\text{}^{99\text{m}}\text{Tc}(\text{H}_2\text{O})(6)(\text{CO})_3]^+$  (11)**

$^{13}\text{C}$  NMR ( $\text{CD}_3\text{CN}$ , 100 MHz):  $\delta$  171.3, 156.5, 143.7, 143.5, 139.8, 122.5, 115.0, 92.8, 48.5, 47.2, 40.6, 27.8, 23.1. After the purification, the same product could be obtained from the reaction with the mixture of regioisomers **6/9**. The analyses were similar with compound **10**. Minor side product with additional **6** (or **9**) coordinated unit was also isolated (less than 1% see SI 5. and 6).

### Calculated HR-MS and spectral accuracy of complex 10.

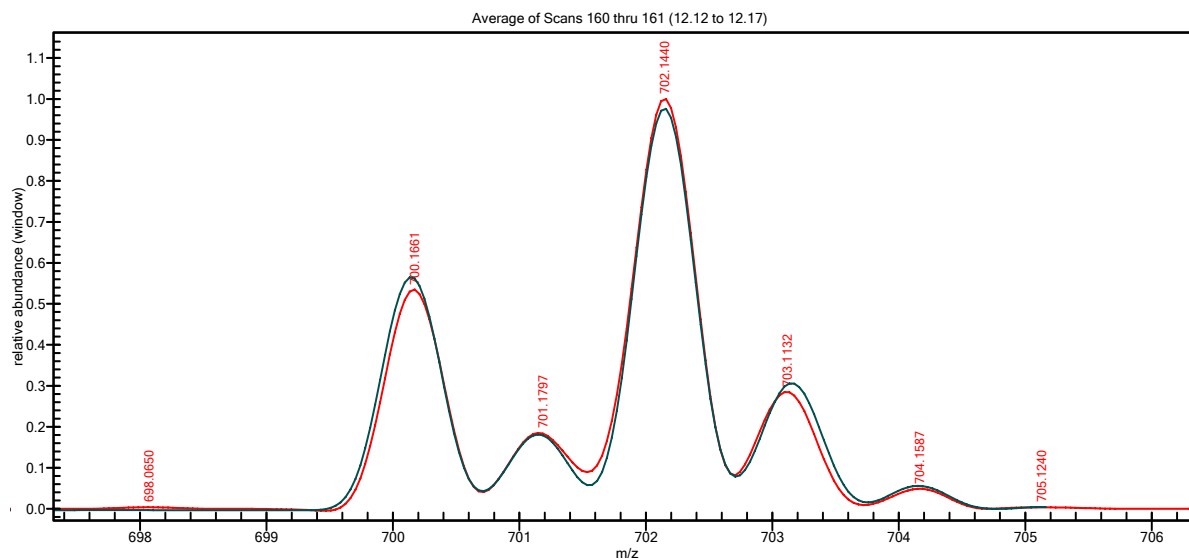

CLIPS Report - D:\Data\Karel\Cerno files9.d\msd1.

09.07.2010 13:18:5

Calibration File D:\Data\Karel\Cerno files\Pure AO Nikos calib.m  
 Calibration Time 09.07.2010 11:07:5

#### RT Windows

Average of Scans 160 thru 161 (12.12 to 12.17)

#### CLIPS Parameter:

Accurate Mass 700.1661  
 Charge 1  
 Mass Tolerance (mDa) 100.00  
 Electron State Both

Double Bond Equivalent Range  
 Minimum: -30.00  
 Maximum: 50.00

Profile Mass Range (Da)  
 Start: -5.00  
 End: 5.00

| Element | Minimum | Maximum |
|---------|---------|---------|
| Re      | 1       | 1       |
| C       | 28      | 28      |
| N       | 5       | 5       |
| O       | 5       | 5       |
| H       | 0       | 694     |

#### CLIPS Search Result

|   | Formula      | Mono Isotope | Mass Error (mDa) | Mass Error (PPM) | Spectral Accuracy | RMSE   | DBE  |
|---|--------------|--------------|------------------|------------------|-------------------|--------|------|
| 1 | ReC28N5O5H29 | 700.1698     | 3.7248           | 5.3198           | 92.9869           | 37.087 | 16.5 |

SI 2. The HPLC-MS trace of complex **10** (Gradient B).

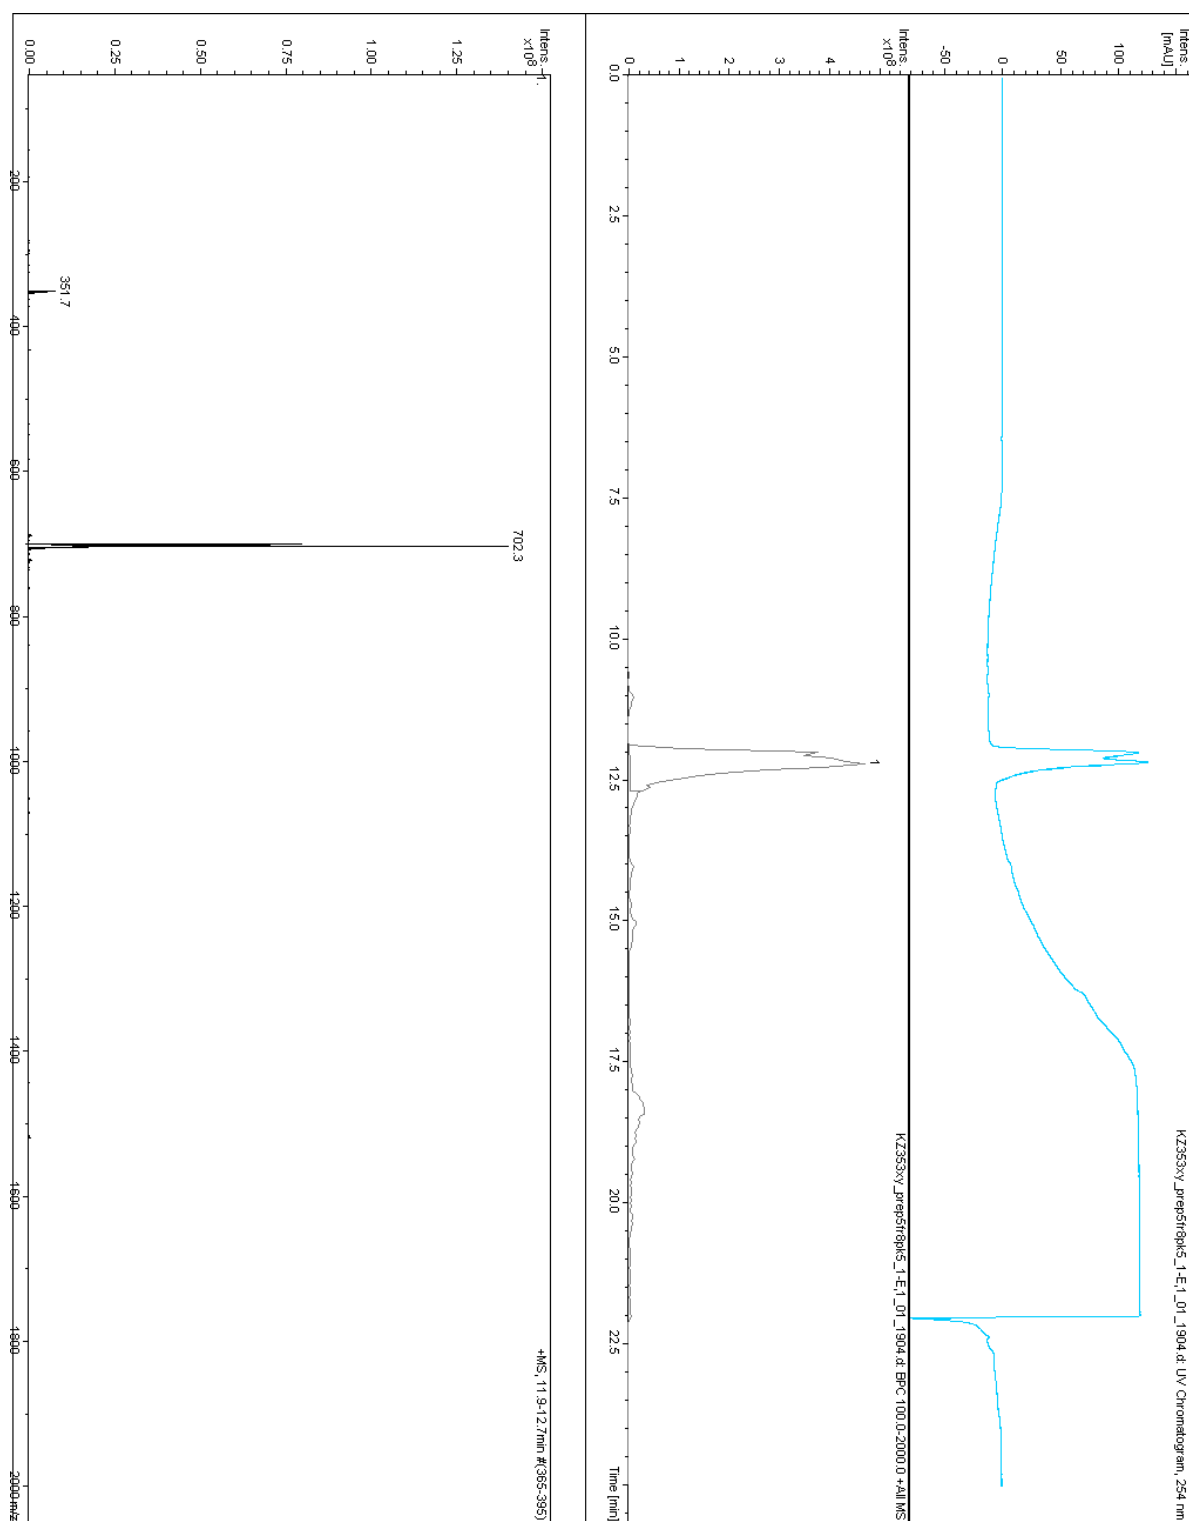

SI 3. The HPLC trace (UV) of complex **10** (Gradient D).

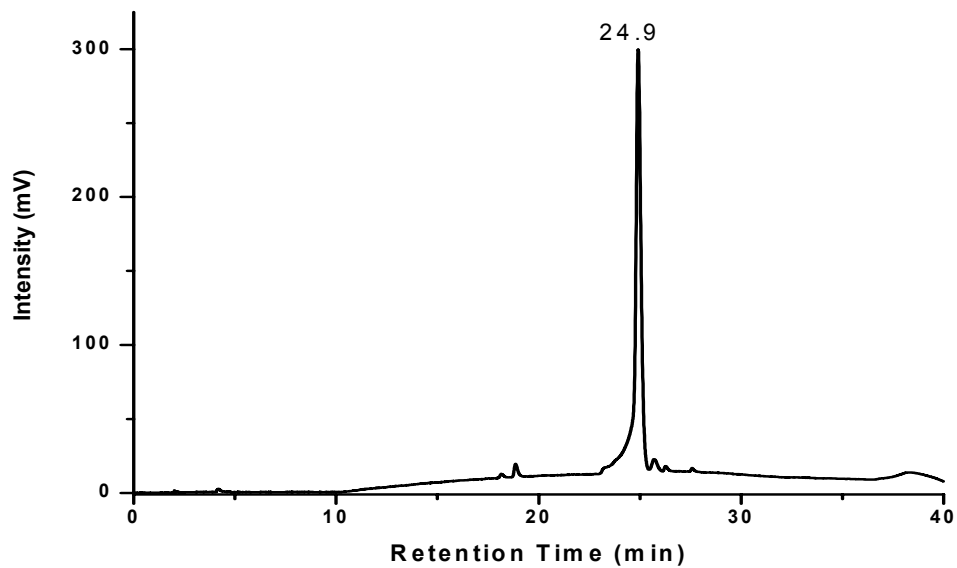

SI 4. The  $\gamma$ -trace HPLC of complex **11** (Gradient D).

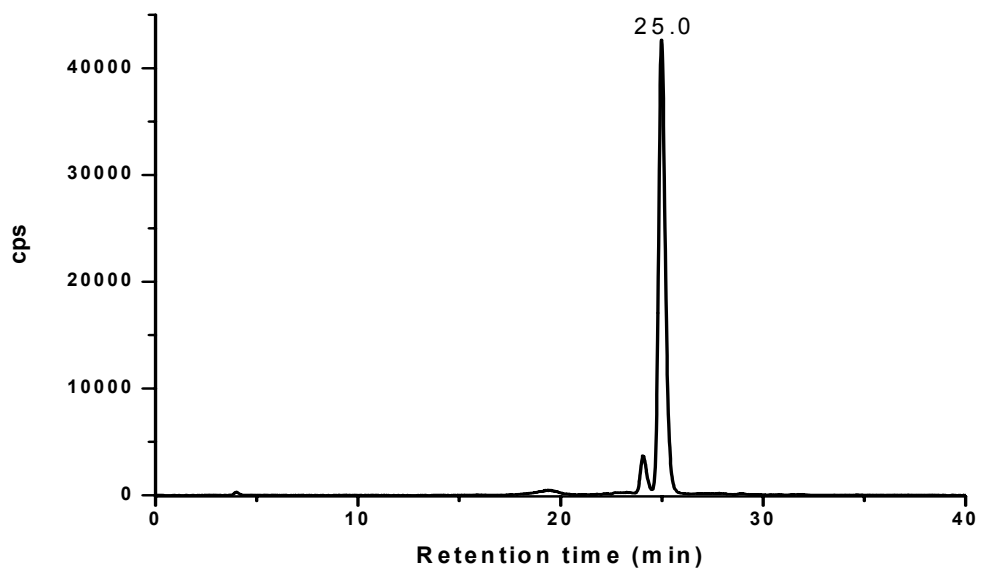

SI 5. The HPLC-MS trace of complex **10** with an additional ligand **6**(or **9**) (Gradient B).

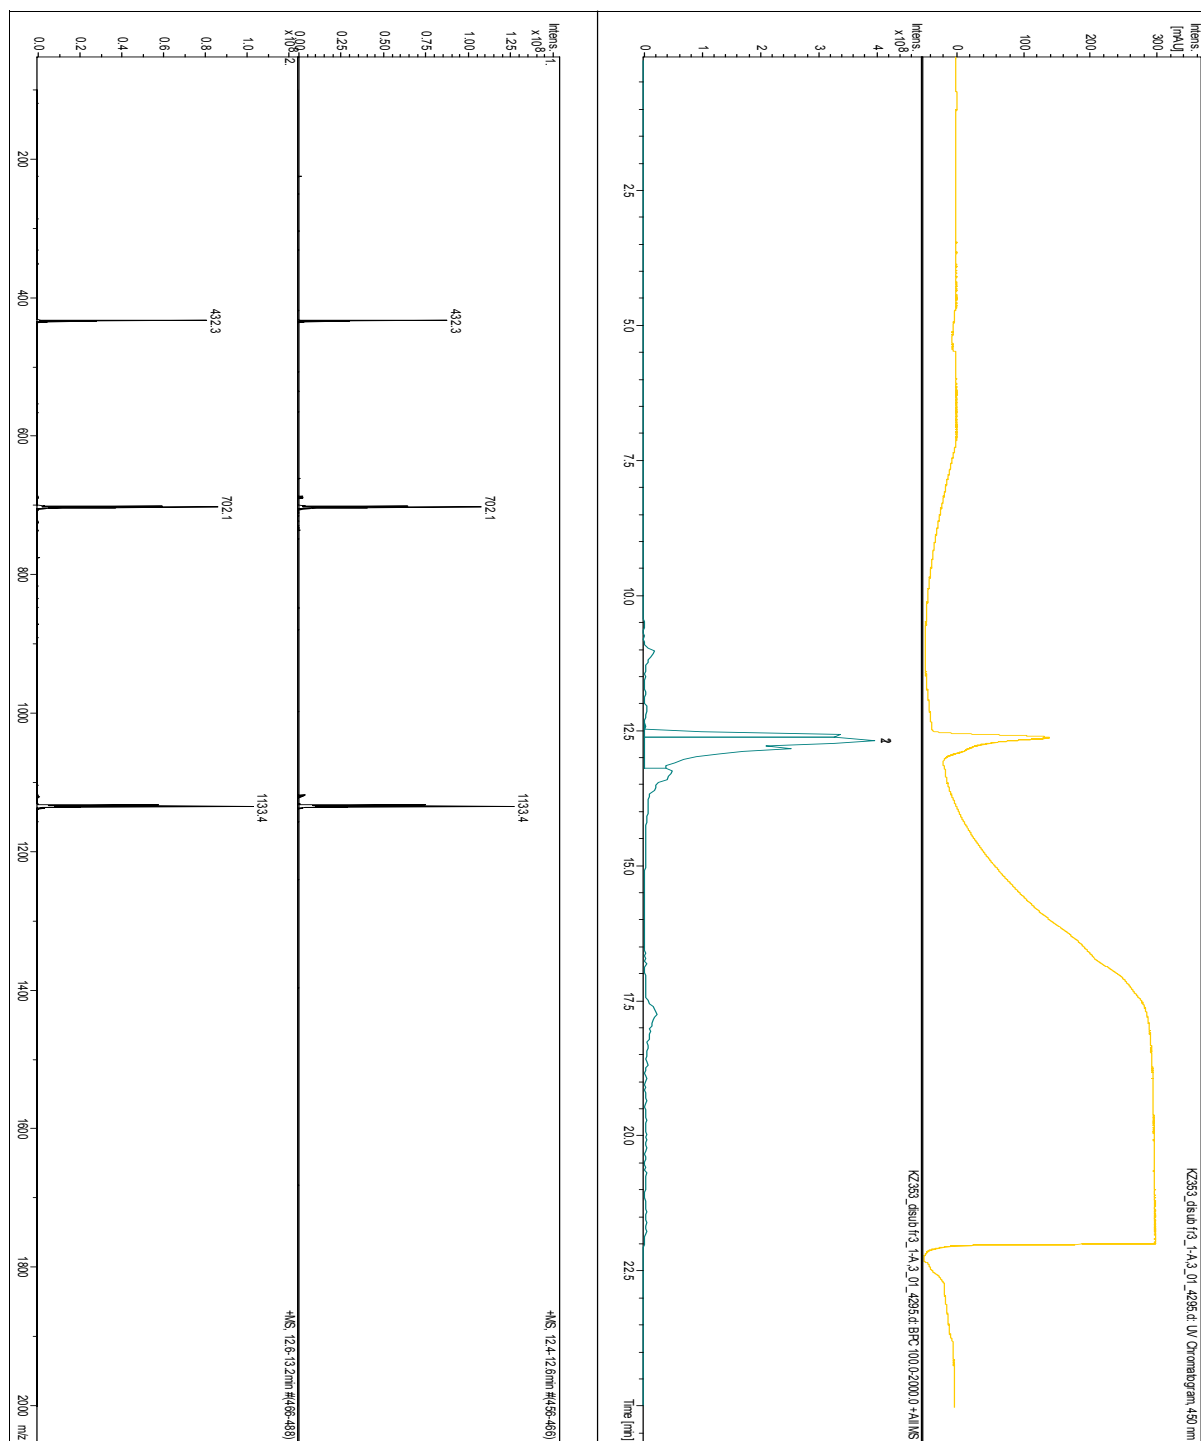



**SI 6.** The HPLC trace (UV) of complex **10** with an additional ligand **6**(or **9**) (Gradient D).

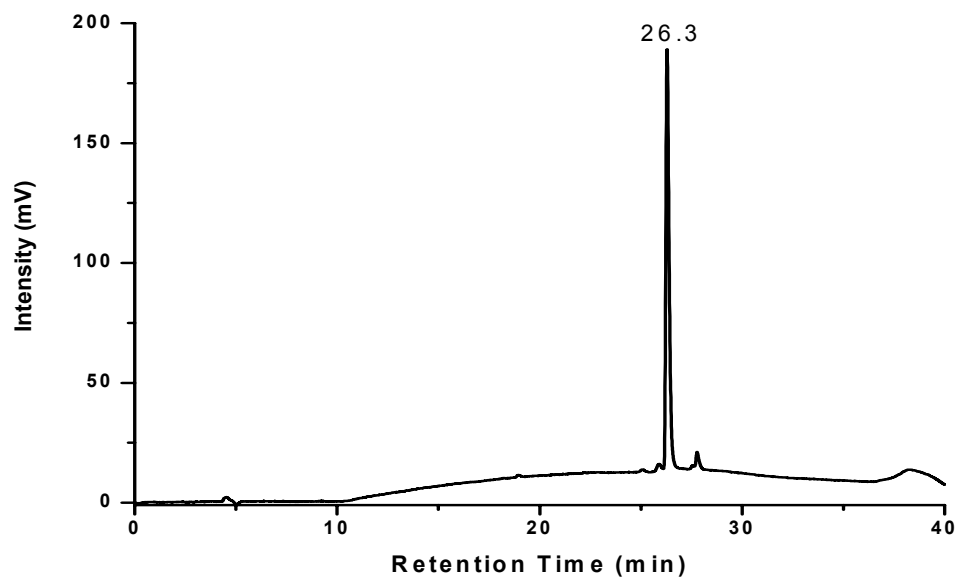

## 4-Isocyanobutyl-bombesin(14)

SI 7. The HPLC-MS trace of complex **14** (Gradient B).

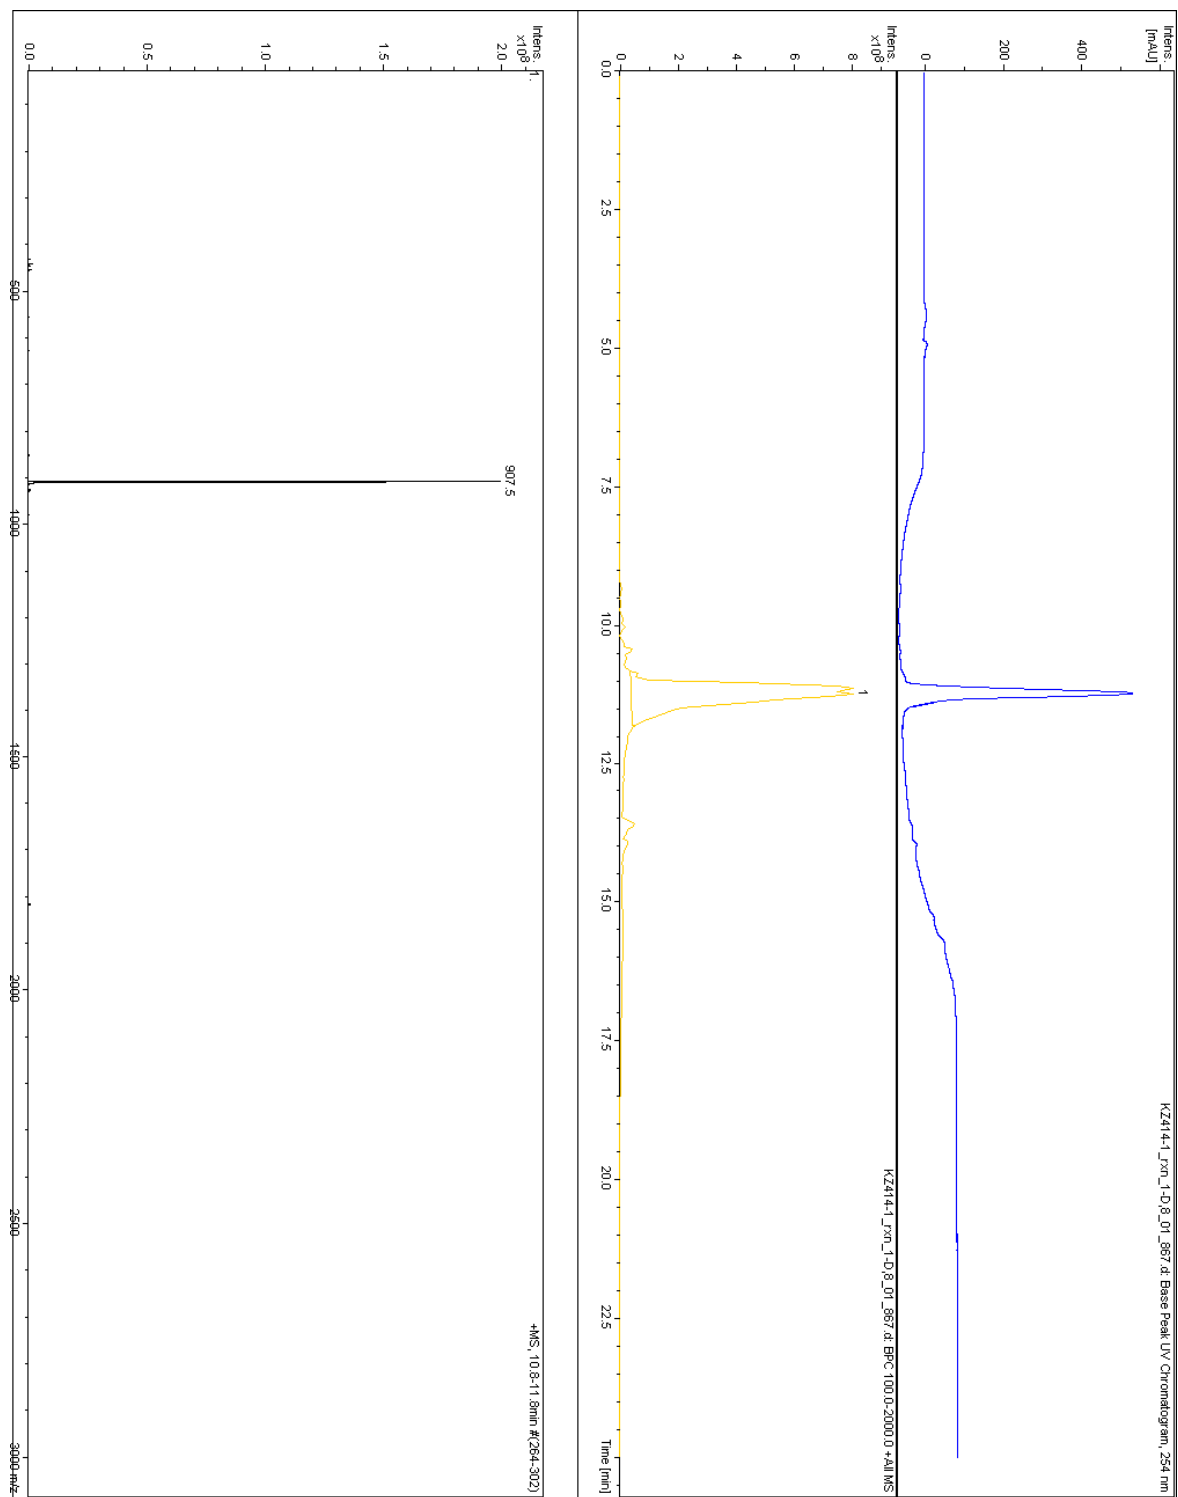

## 4-Isocyanobutryl-bombesin(16)

SI 8. The HPLC-MS trace of complex 16 (Gradient B).

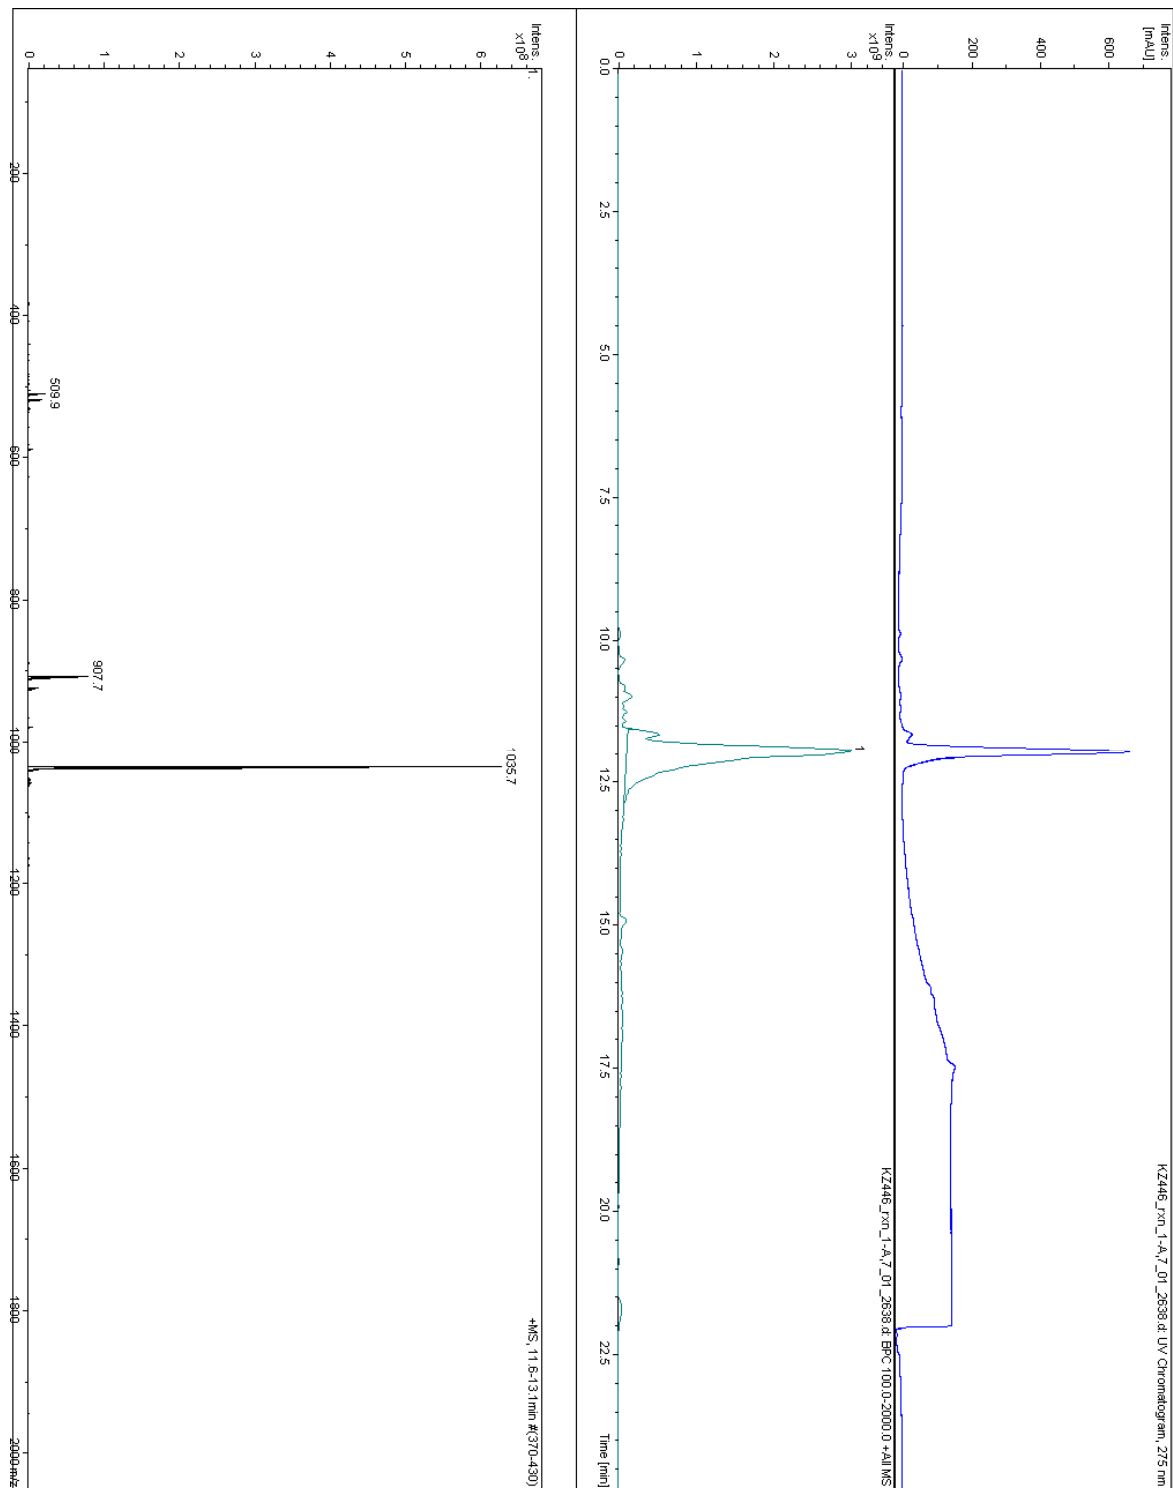

**[Re(14)(6)(CO)<sub>3</sub>]<sup>+</sup> (17) and [<sup>99m</sup>Tc(14)(6)(CO)<sub>3</sub>]<sup>+</sup> (18)**

**SI 9.** The HPLC-MS trace of complex **17** (Gradient B).

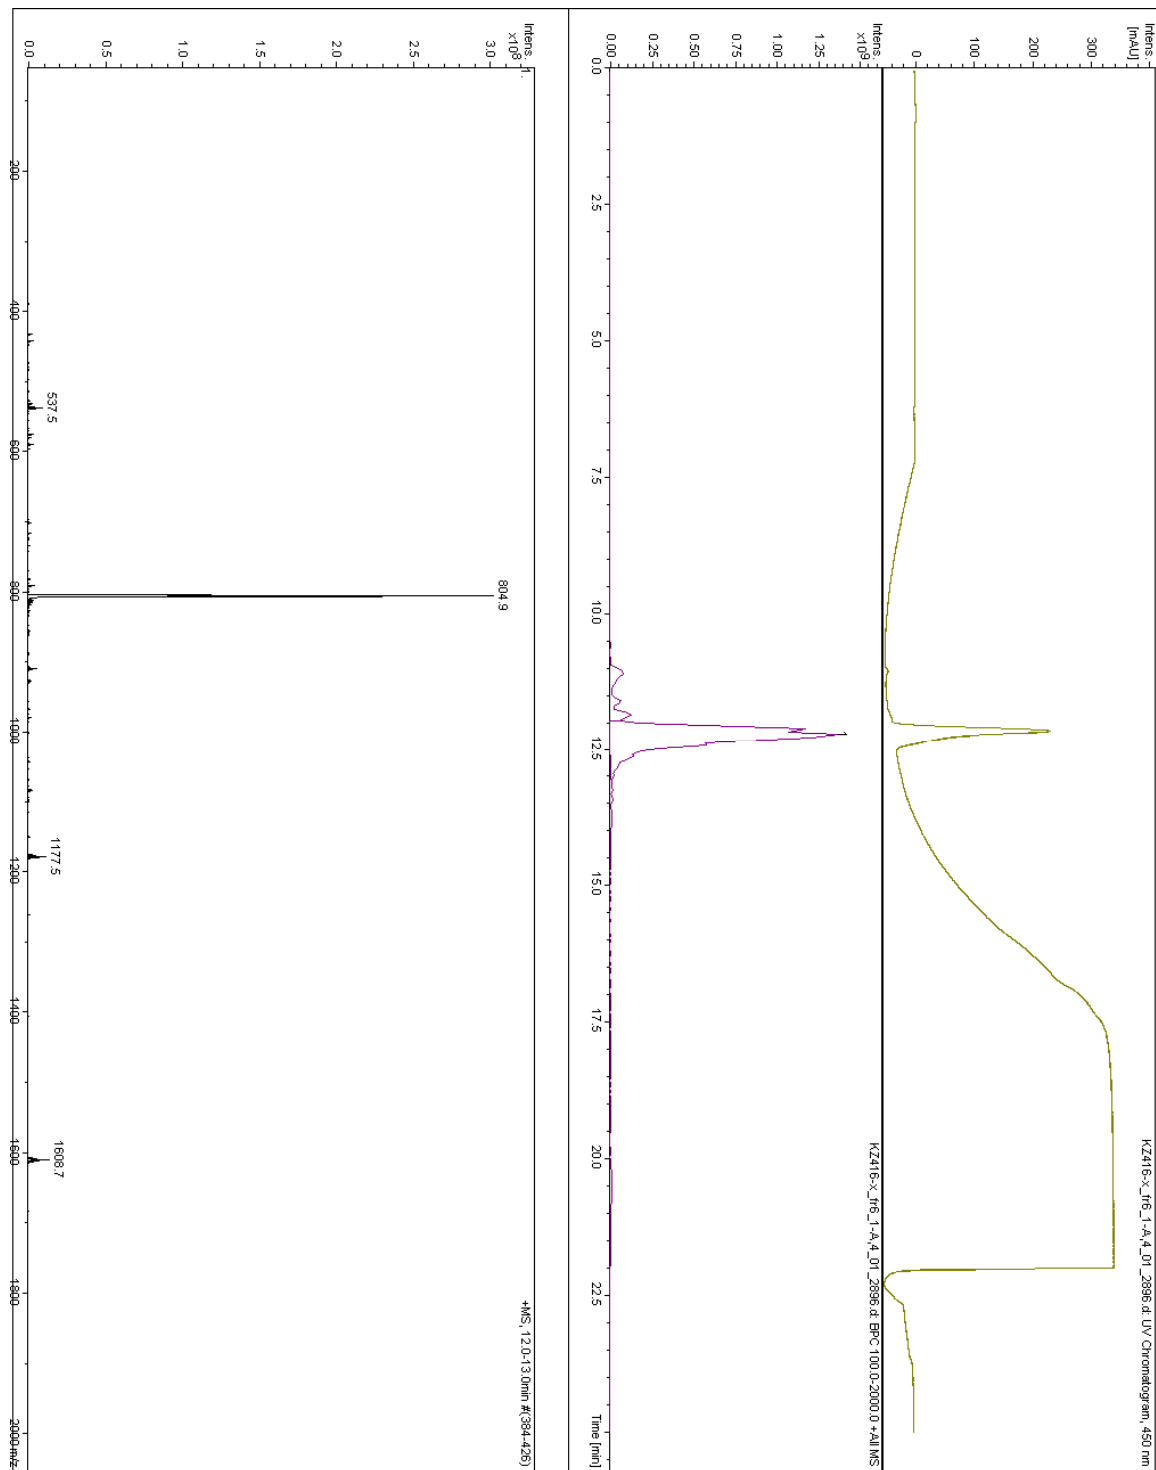

SI 10. The HPLC trace (UV) of complex **17** (Gradient D).

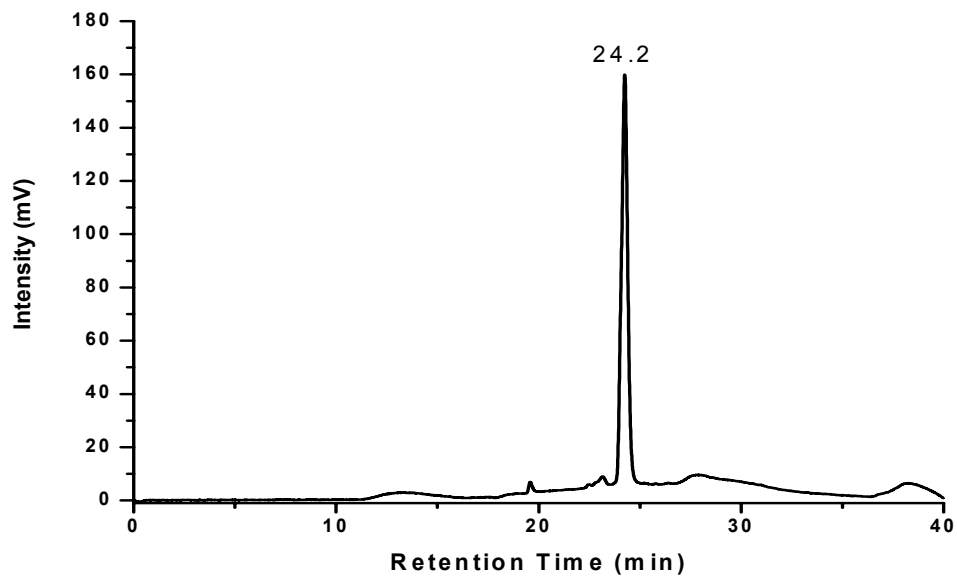

SI 11. The  $\gamma$ -trace HPLC of complex **18** (Gradient D).

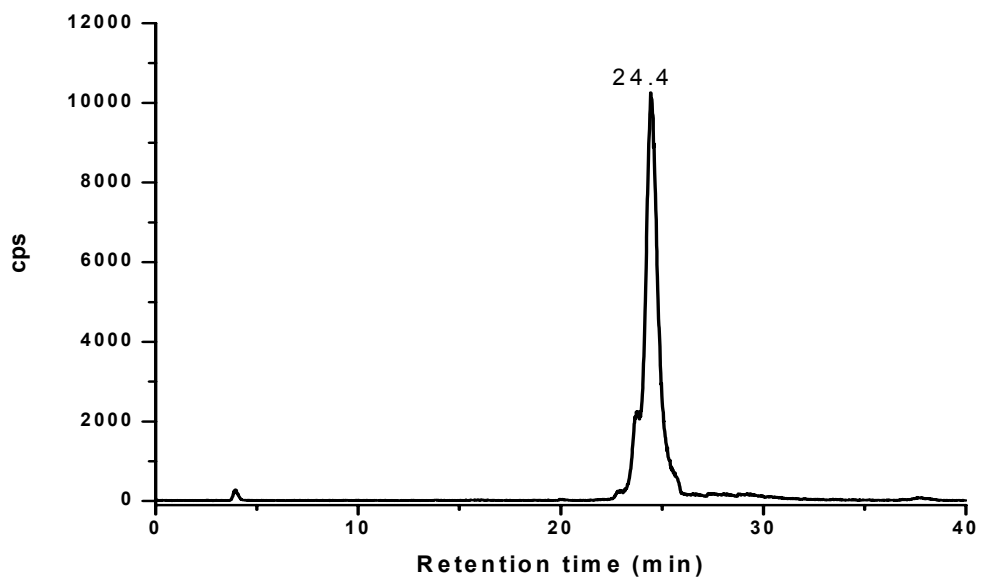

**SI 12.** The HPLC-MS trace (and DAD) of complex **17** (Gradient B) after incubation over PC3 cells in F12 medium for 24 H ( $c = 1$  mmol).

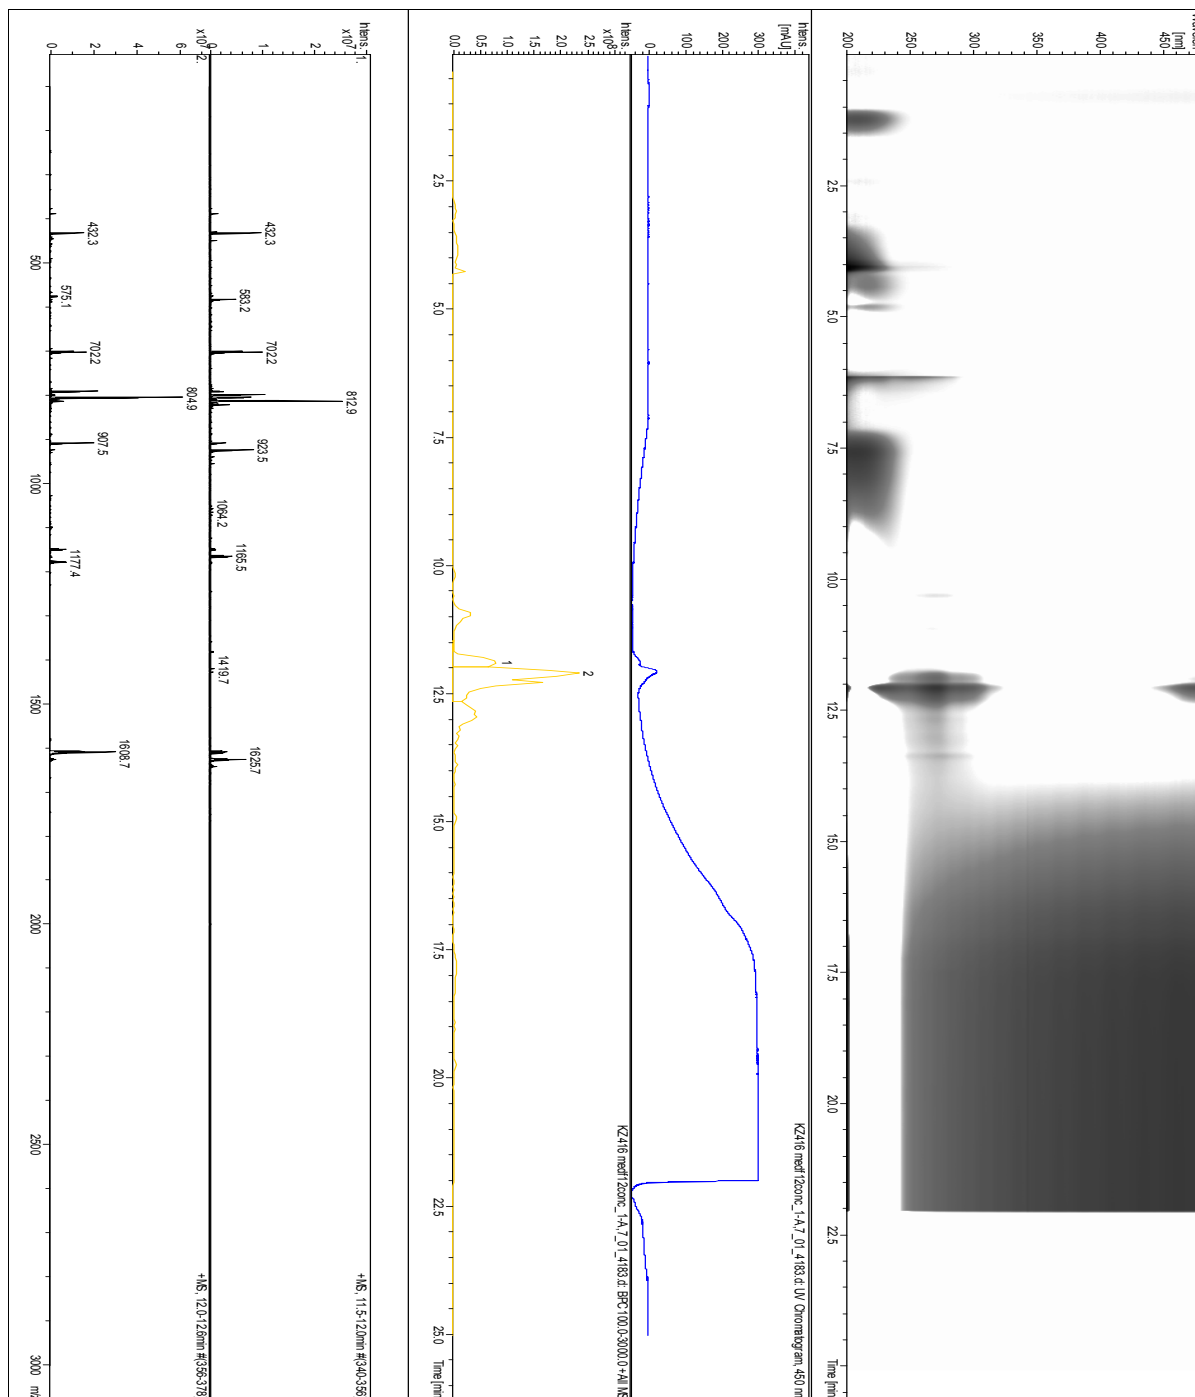

**SI 13.** Uptake of **17** by PC-3 cells after incubation for 12 H ( $c = 20 \mu\text{mol}$ ), evaluated by fluorescence microscopy (green channel, blue channel, merged).

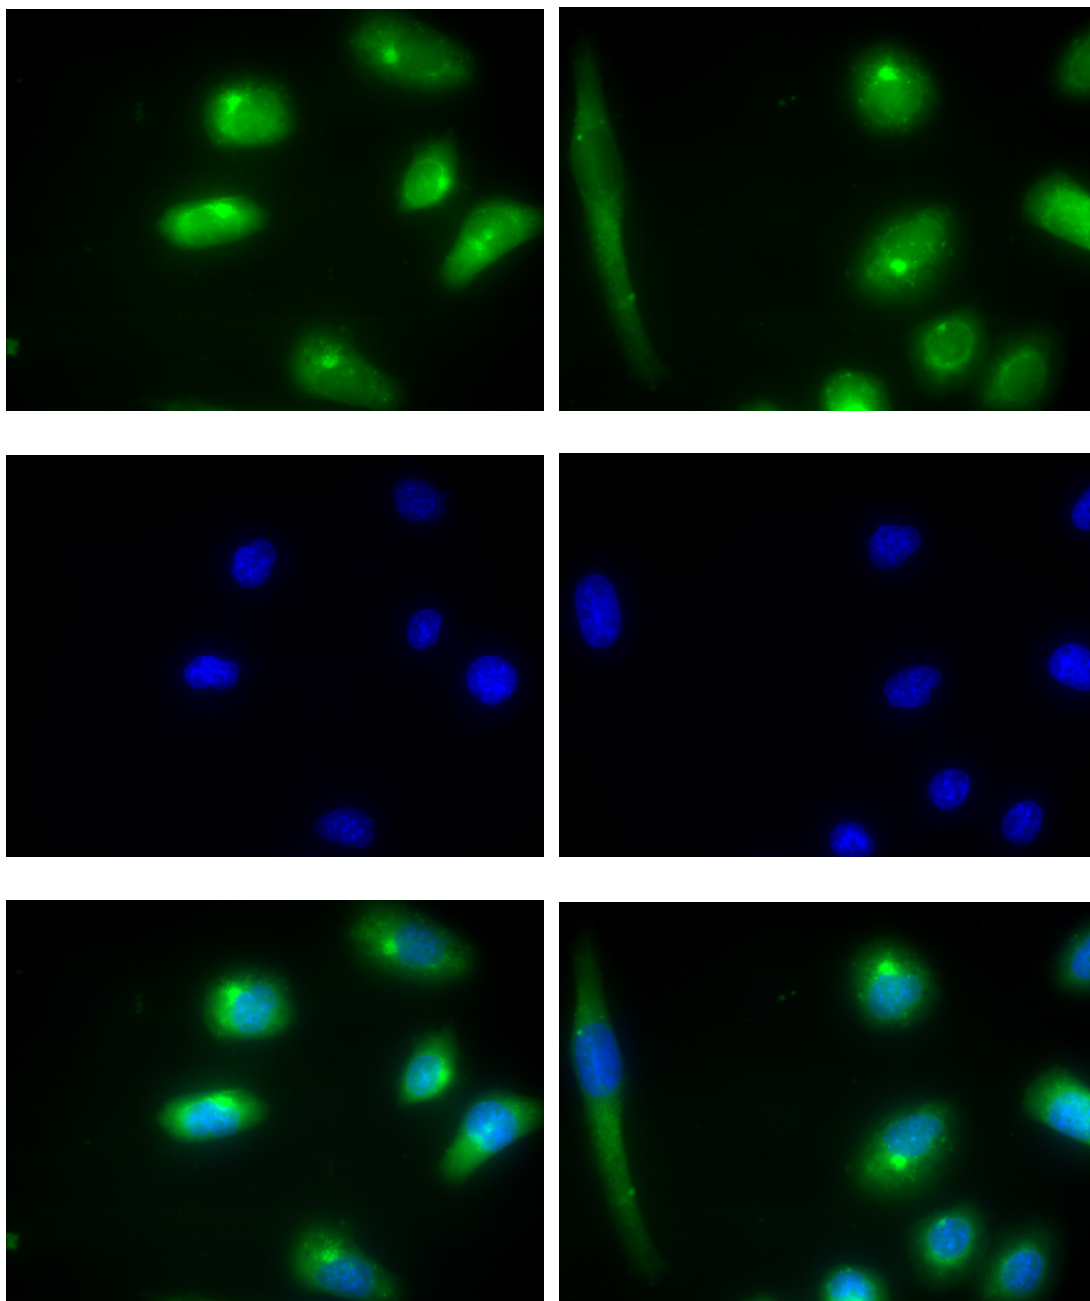

### [Re(16)(6)(CO)<sub>3</sub>]<sup>+</sup> (19) and [<sup>99m</sup>Tc(16)(6)(CO)<sub>3</sub>]<sup>+</sup> (20)

SI 14. The HPLC-MS (MS<sup>2</sup>) trace of complex 19 (Gradient B).

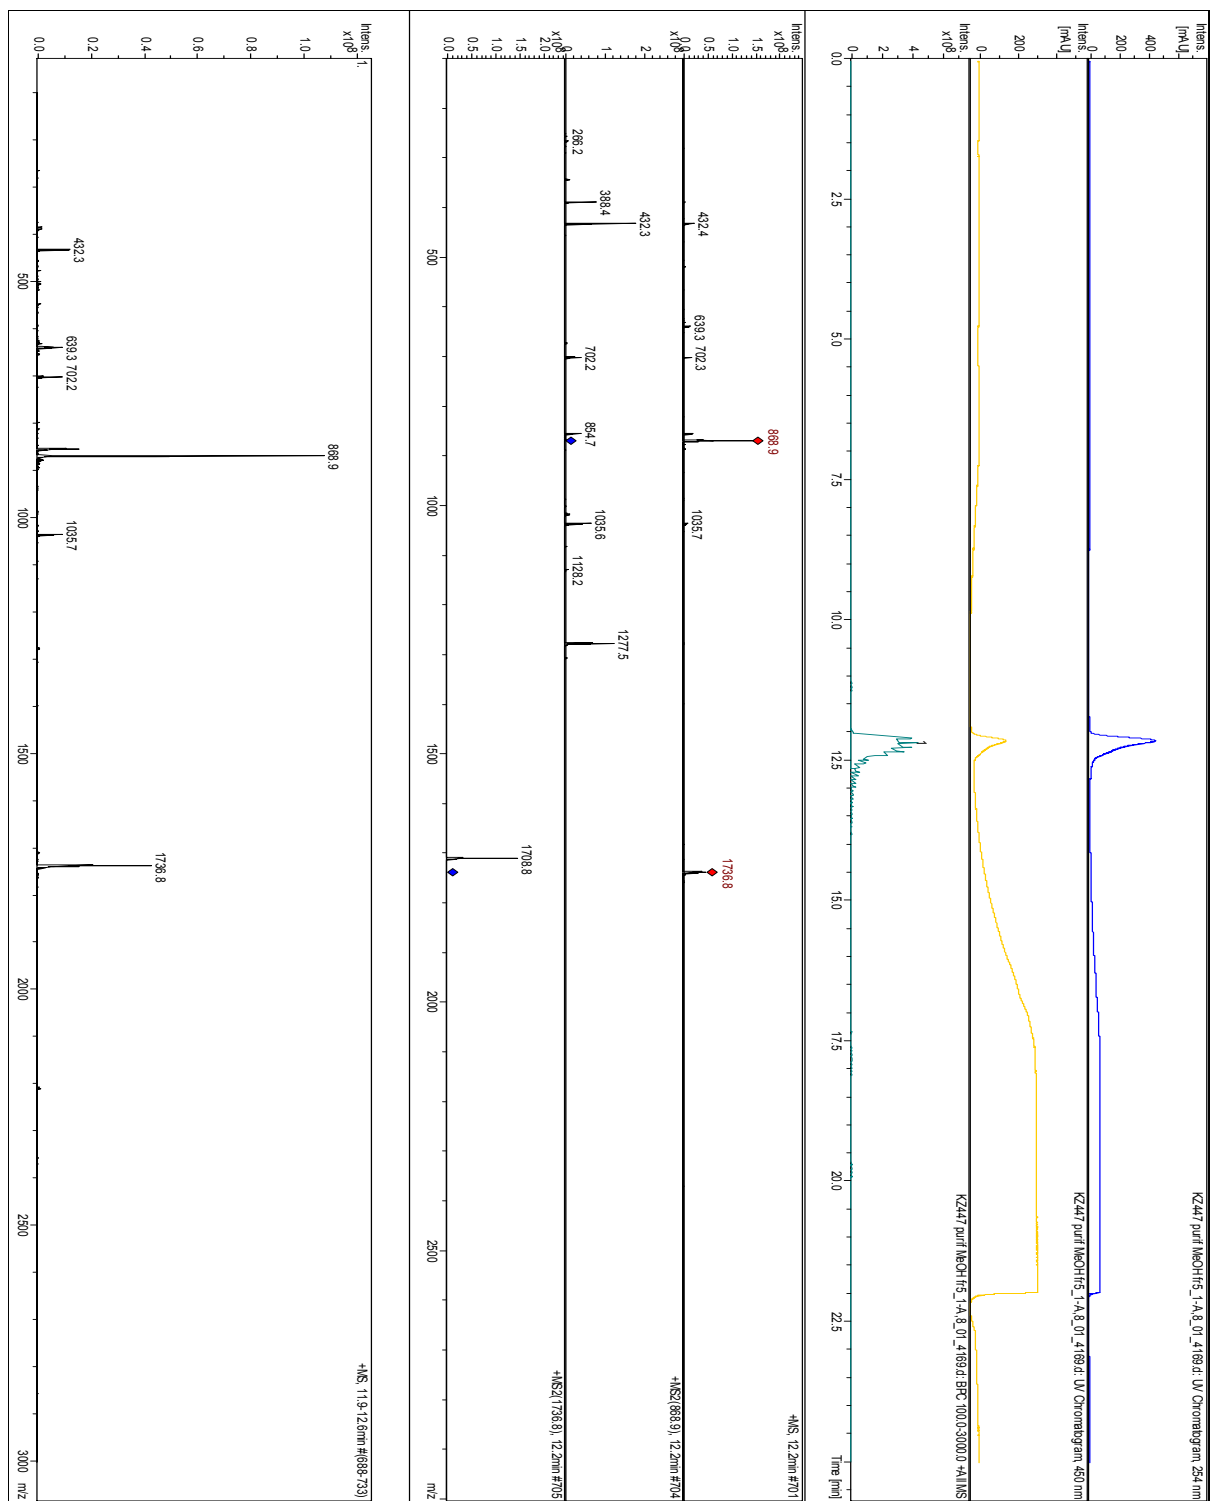



**SI 15.** The radioHPLC trace of complex **20** (dashed line) and trace of complex **20** after incubation over PC3 cells in F12 medium for 6 H (solid line, Gradient D).

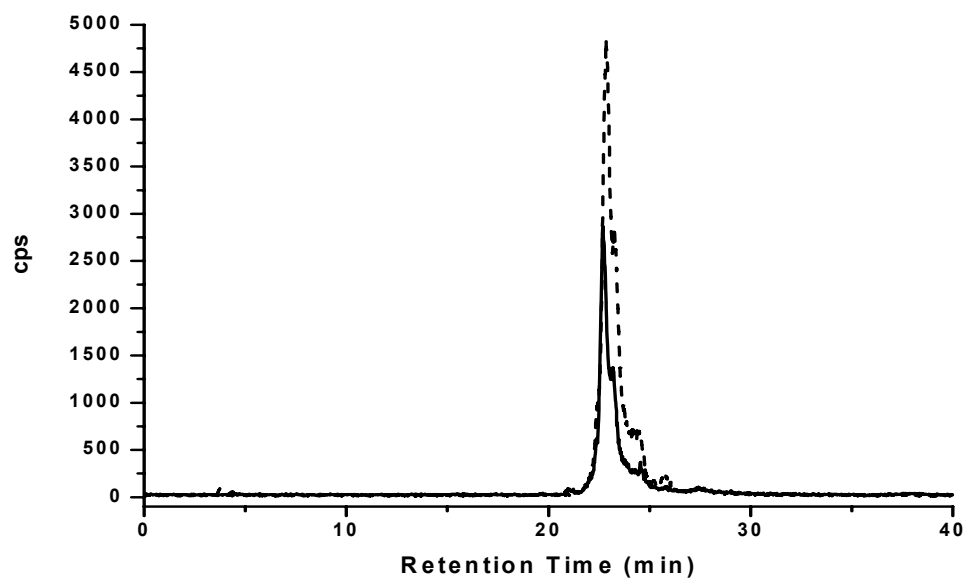

**SI 16.** Uptake of **19** by PC-3 (left) and B16 BL6 (right) cells after incubation for 6 H ( $c = 20 \mu\text{mol}$ ), then 24 H fresh medium, evaluated by fluorescence microscopy (green channel, blue channel, merged). The pictures were taken with similar exposure time for the green channel.

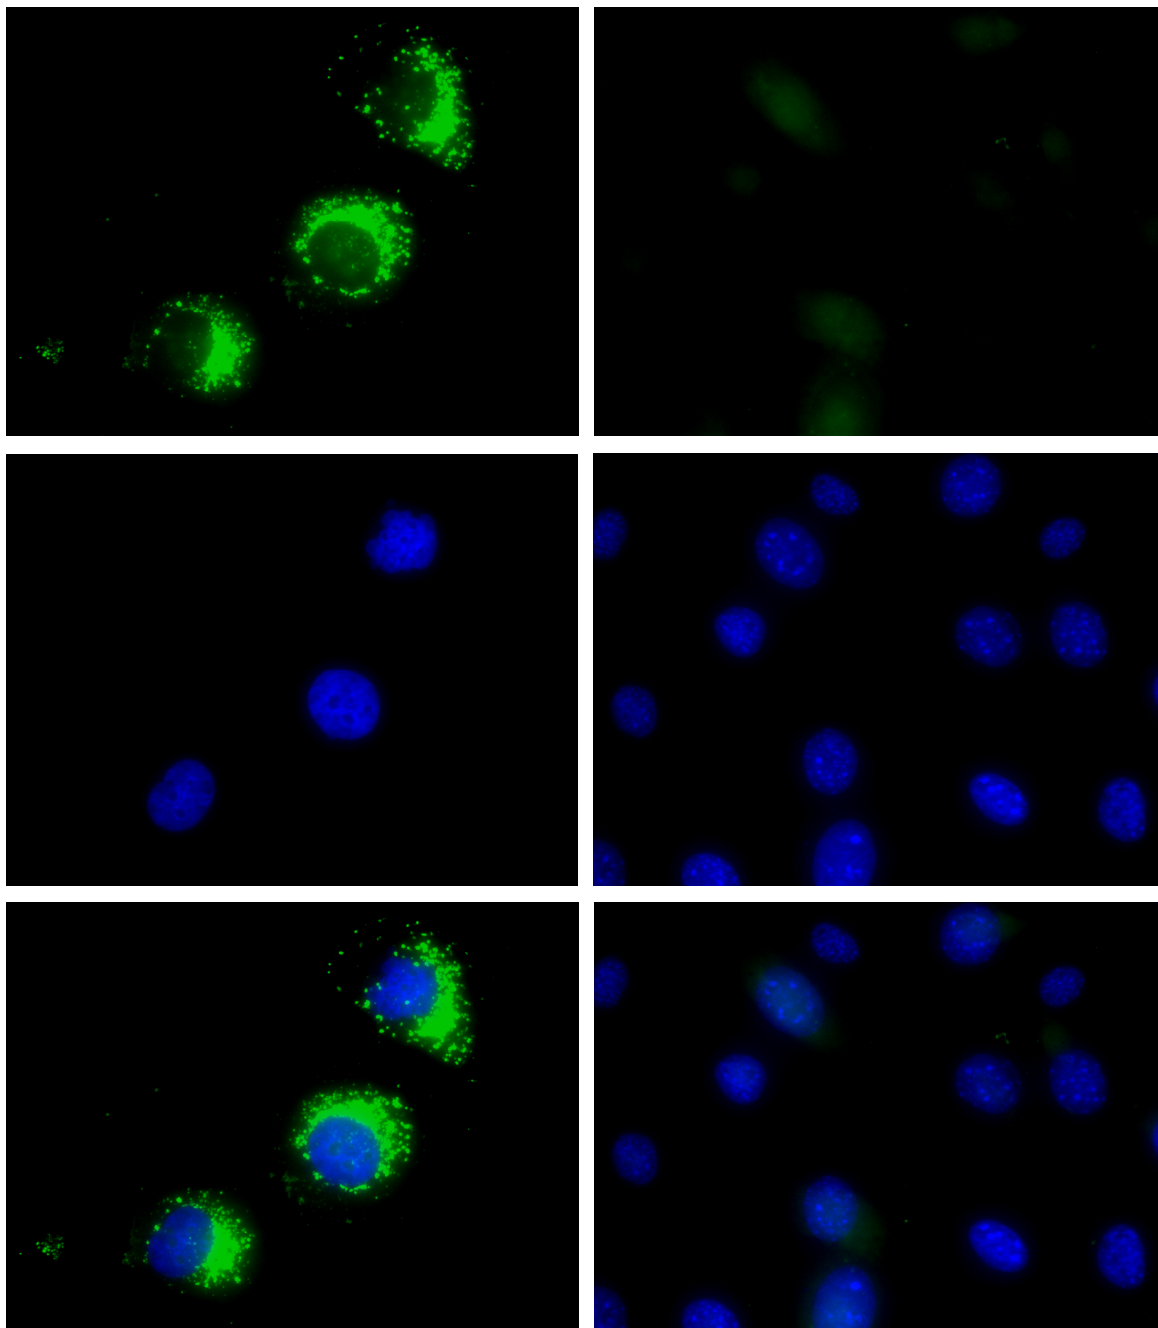

Uptake of **19** by PC-3 (left) and B16 BL6 (right) cells. The pictures were taken without similar exposure time for the green channel (the exposure time for B16BL6 was considerably longer than for PC-3).

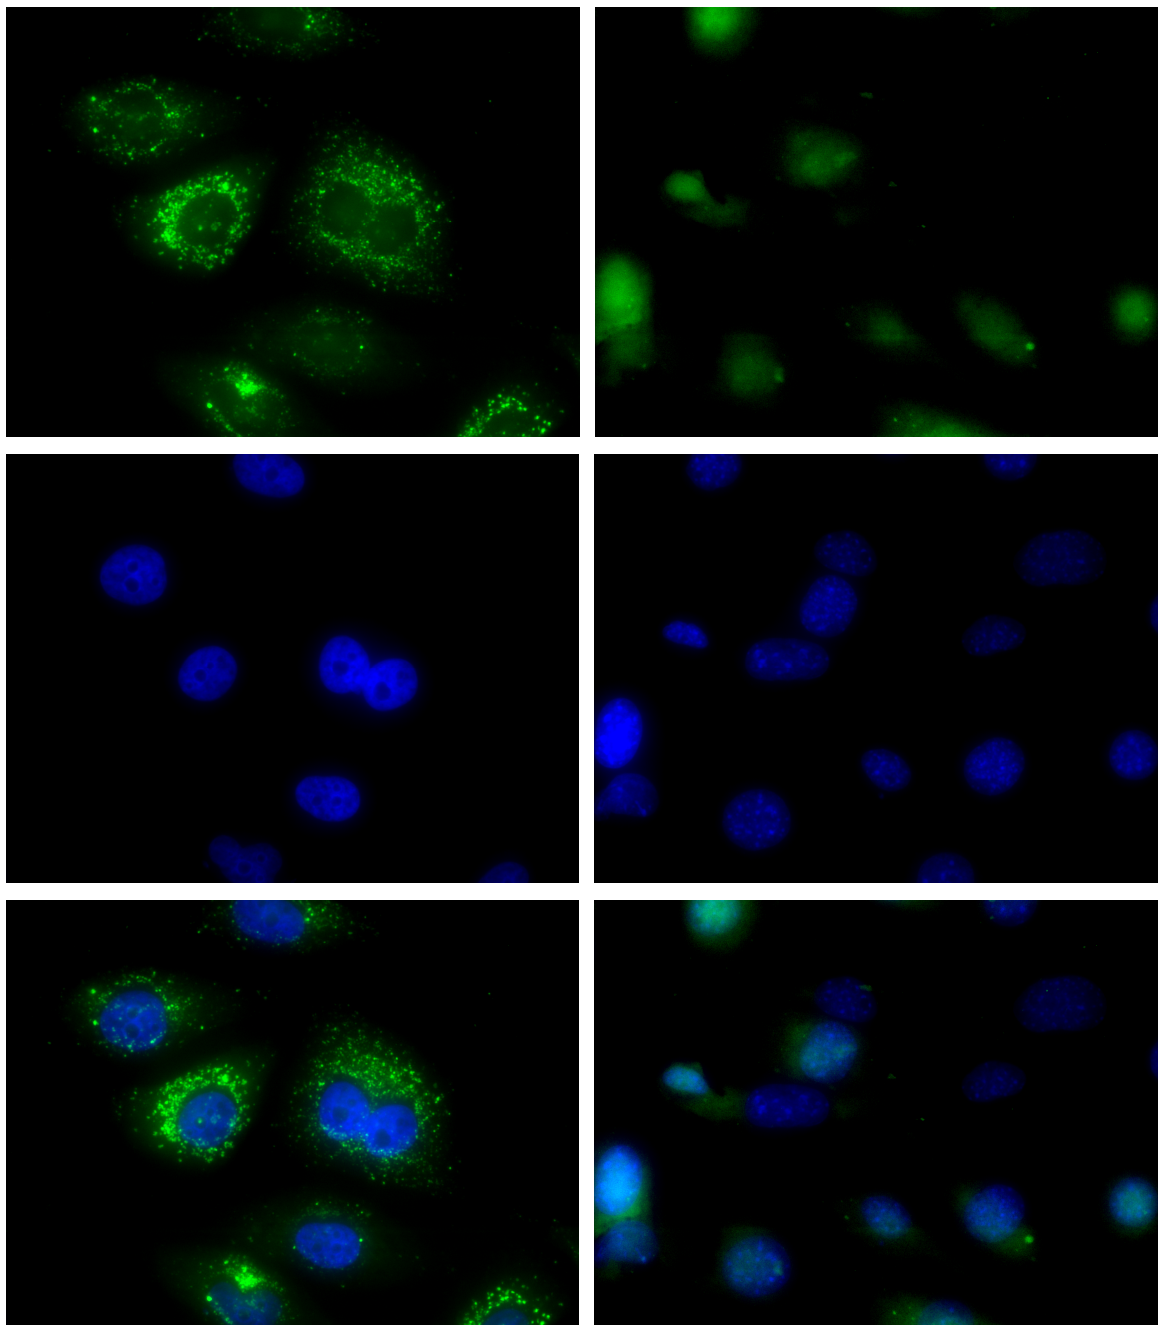

Supplement: c0ob00504e.pdf [file c0ob00504e.pdf]
